# Supplementary material
Source: publisher site journal article supplement (https://www.dovepress.com/get_supplementary_file.php?f=270265.docx)
Supplement: Supplementary file 1 [file get_supplementary_file.php]

**Supplementary Table S1. HR-HPV genotyping prevalence results in women with ASC-US stratified by histopathologic outcome (N=2393)**

| **HR-HPV types** | **Histologic diagnosis** | | | | |
| --- | --- | --- | --- | --- | --- |
| **Normal**  **n=1670, n(%)** | **CIN1**  **n=481, n(%)** | **CIN2**  **n=118, n(%)** | **CIN3**  **n=91, n(%)** | **Cancer**  **n=33, n(%)** |
| HR-HPV* | 545(32.6%) | 364(75.7%) | 109(92.4%) | 89(97.8%) | 32(97.0%) |
| HPV16 | 63(3.8%) | 47(9.8%) | 42(35.6%) | 53(58.2%) | 21(63.6%) |
| HPV18 | 39(2.3%) | 32(6.7%) | 10(8.5%) | 4(4.4%) | 3(9.1%) |
| HPV31 | 28(1.7%) | 23(4.8%) | 11(9.3%) | 1(1.1%) | 1(3.0%) |
| HPV33 | 28(1.7%) | 29(6.0%) | 6(5.1%) | 7(7.7%) | 1(3.0%) |
| HPV35 | 13(0.8%) | 10(2.1%) | 2(1.7%) | 1(1.1%) | 0(0.0%) |
| HPV39 | 41(2.5%) | 23(4.8%) | 5(4.2%) | 0(0.0%) | 0(0.0%) |
| HPV45 | 18(1.1%) | 11(2.3%) | 2(1.7%) | 1(1.1%) | 1(3.0%) |
| HPV51 | 64(3.8%) | 34(7.1%) | 3(2.5%) | 2(2.2%) | 0(0.0%) |
| HPV52 | 165(9.9%) | 119(24.7%) | 28(23.7%) | 14(15.4%) | 3(9.1%) |
| HPV56 | 36(2.2%) | 39(8.1%) | 3(2.5%) | 2(2.2%) | 1(3.0%) |
| HPV58 | 84(5.0%) | 66(13.7%) | 28(23.7%) | 19(20.9%) | 4(12.1%) |
| HPV59 | 39(2.3%) | 17(3.5%) | 3(2.5%) | 2(2.2%) | 1(3.0%) |
| HPV66 | 36(2.2%) | 22(4.6%) | 1(0.8%) | 0(0.0%) | 1(3.0%) |
| HPV68 | 45(2.7%) | 20(4.2%) | 1(0.8%) | 1(1.1%) | 0(0.0%) |

ASC-US, atypical squamous cells of undetermined significance; HR-HPV, high-risk human papillomavirus, including types HPV-16, -18, -31, -33, -35, -39, -45, -51, -52, -56, -58, -59, -66, -68; CIN, cervical intraepithelial neoplasia.
